# Supplementary material for: The use of radiocobalt as a label improves imaging of EGFR using DOTA-conjugated Affibody molecule
Source: PubMed Central journal article supplement (PMC5519605; doi:10.1038/s41598-017-05700-7), 2017-07-20
Supplement: 41598_2017_5700_MOESM1_ESM.pdf [file 41598_2017_5700_MOESM1_ESM.pdf]

## **SUPPLEMENTARY INFORMATION**

### **The use of radiocobalt as a label improves imaging of EGFR using DOTA-conjugated Affibody molecule**

Javad Garousi<sup>1</sup>, Ken G. Andersson<sup>2</sup>, Johan H. Dam<sup>3</sup>, Birgitte B. Olsen<sup>3</sup>, Bogdan Mitran<sup>4</sup>, Anna Orlova<sup>4</sup>, Jos Buijs<sup>1</sup>, Stefan Ståhl<sup>2</sup>, John Löfblom<sup>2</sup>, Helge Thisgaard<sup>3</sup>, Vladimir Tolmachev<sup>1\*</sup>.

<sup>1</sup> Department of Immunology, Genetics and Pathology, Uppsala University, Uppsala, Sweden;

<sup>2</sup> Department of Protein Technology, KTH - Royal Institute of Technology, Stockholm, Sweden;

<sup>3</sup> Department of Nuclear Medicine, Odense University Hospital, Sdr. Boulevard 29, 5000 Odense, Denmark;

<sup>4</sup> Division of Molecular Imaging, Department of Medicinal Chemistry, Uppsala University, Uppsala, Sweden

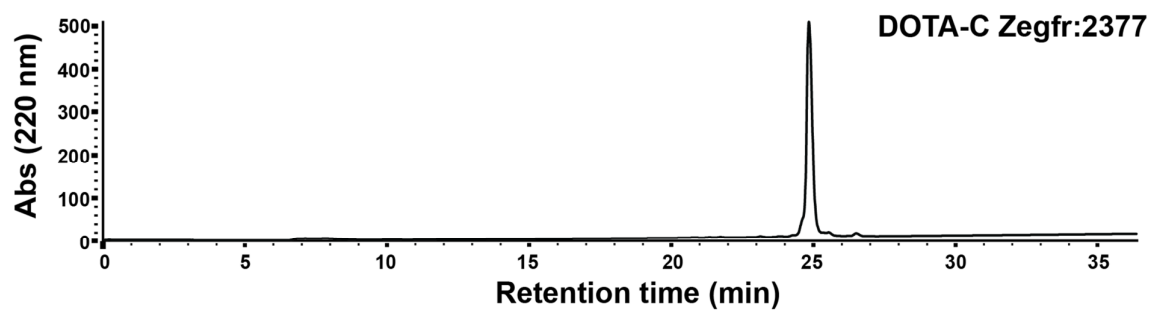

**Supplementary Figure S1.** Analytical RP-HPLC analysis of purified DOTA-Z<sub>EGFR:2377</sub>. The absorbance was measured at 220 nm.

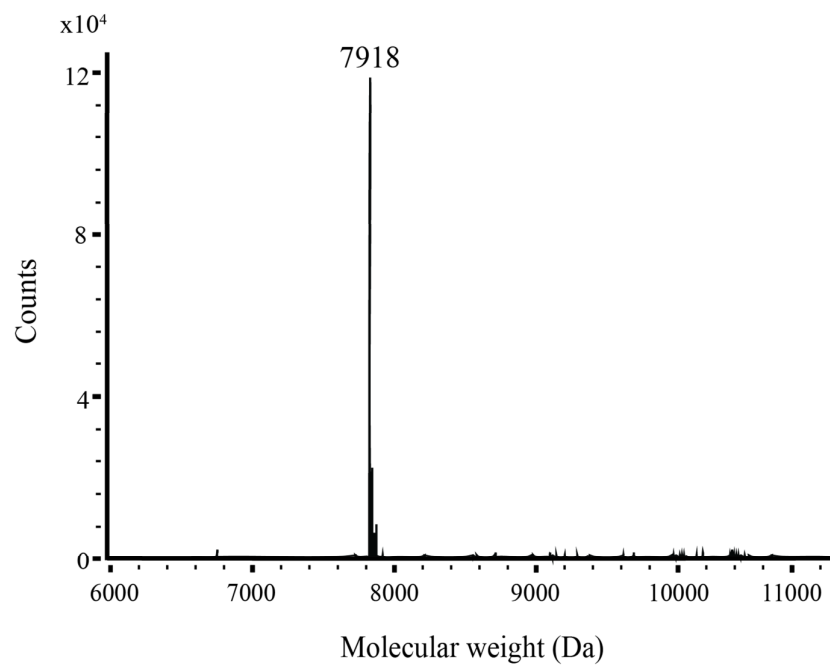

**Supplementary Figure S2.** Mass spectrum of purified DOTA-Z<sub>EGFR:2377</sub>.

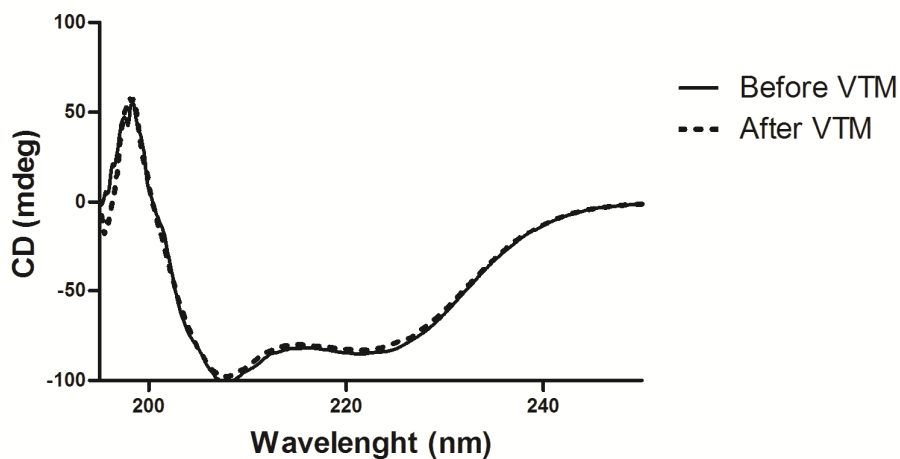

**Supplementary Figure S3.** Overlay of circular dichroism spectra from 195- 250 nm for DOTA-Z<sub>EGFR:2377</sub> before (solid line) and after (dashed line) heating from 20-90°C.

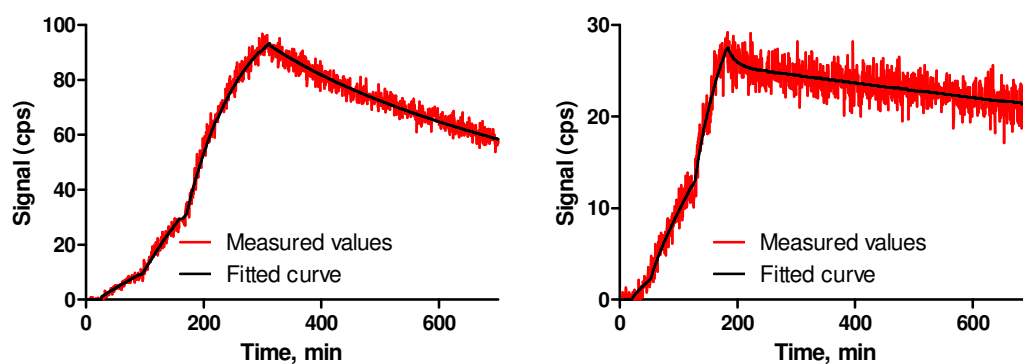

**Supplementary Figure S4.** Representative sensorgrams of the LigandTracer measurement to determine the kinetics and affinity of <sup>111</sup>In- DOTA-Z<sub>EGFR:2377</sub> (left) and <sup>57</sup>Co-DOTA-Z<sub>EGFR:2377</sub> (right) to EGFR on A431 cells.

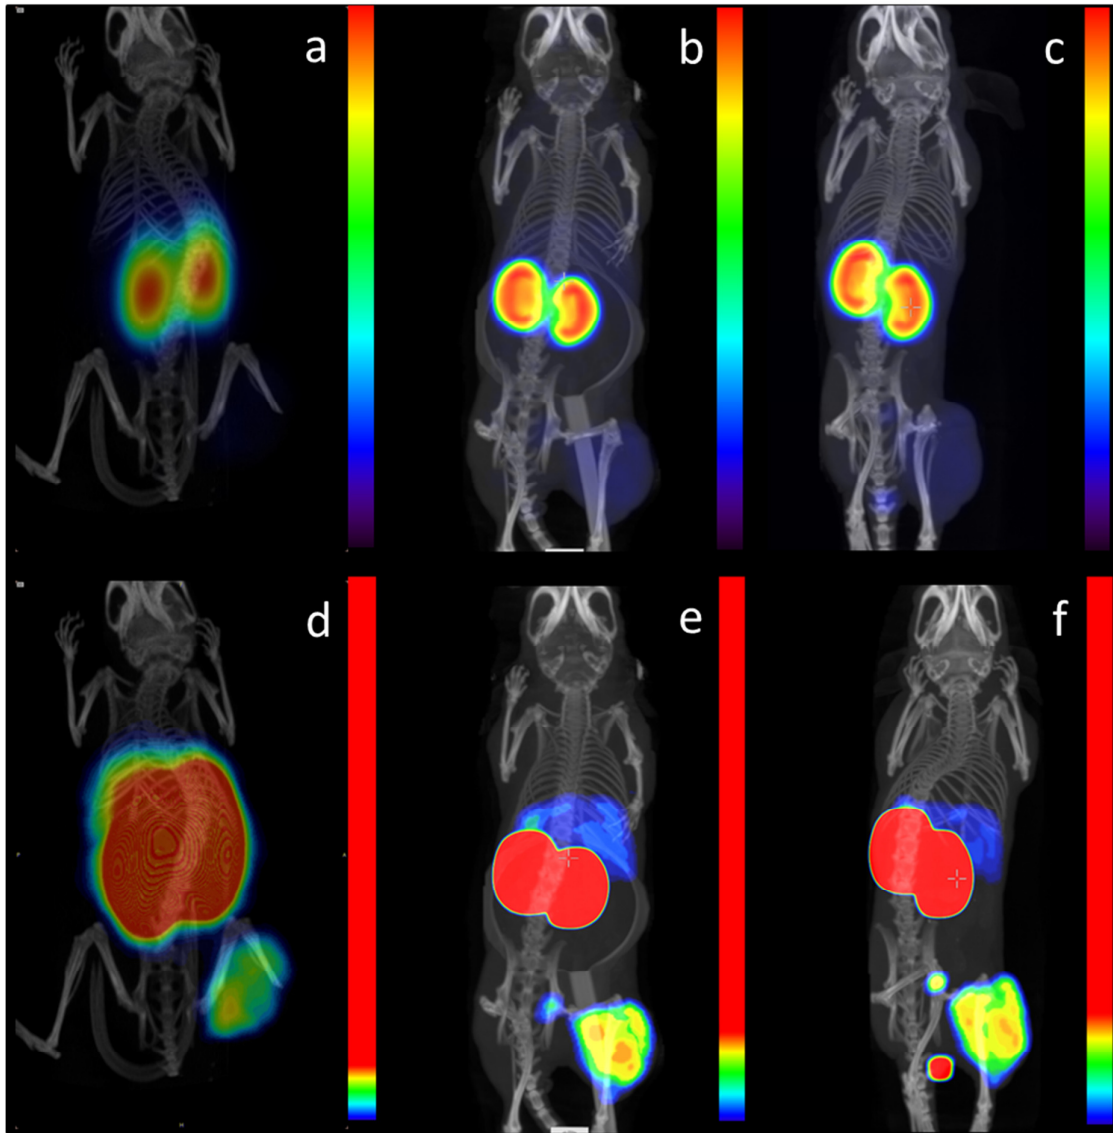

**Supplementary Figure S5.** PET/CT imaging using  $^{68}\text{Ga}$ -DOTA- $Z_{\text{EGFR}:2377}$  (a and d) and microSPECT/CT using  $^{57}\text{Co}$ -DOTA- $Z_{\text{EGFR}:2377}$  at 3 h (b and e) and 24 h (c and f) after injection of mice bearing EGFR-expressing A431 xenografts. The relative colour scales were normalized to the highest activity in images a, b and c, and then adjusted to provide first red pixel in tumours in images d, e and f (8, 13 and 17% of the full scale, respectively).

**Supplementary Table S1.** Radiochemical yields and specific activities of imaging probes used in this study.

|                                               | Yield, decay corrected; % | Max. specific activity at the end of synthesis; MBq/ $\mu$ g (GBq/ $\mu$ mol) |
|-----------------------------------------------|---------------------------|-------------------------------------------------------------------------------|
| $^{57}\text{Co}$ -DOTA-Z <sub>EGFR:2377</sub> | > 99%                     | 0.30 (2.34)                                                                   |
| $^{55}\text{Co}$ -DOTA-Z <sub>EGFR:2377</sub> | > 99%                     | 0.98 (7.05)                                                                   |
| $^{68}\text{Ga}$ -DOTA-Z <sub>EGFR:2377</sub> | 98.9 $\pm$ 0.5%           | 2.05 (16.3)                                                                   |

**Supplementary Table S2.** Long-lived positron-emitting radionuclides. Data are taken from

Tolmachev, V. & Stone-Elander S. Radiolabelled proteins for positron emission tomography: Pros and cons of labelling methods. *Biochim. Biophys. Acta.* **1800**, 487-510 (2010).

| Nuclide          | Half-life, hour | Mode of decay                            | Principal photon emissions, keV (abundance in %)                                                                                |
|------------------|-----------------|------------------------------------------|---------------------------------------------------------------------------------------------------------------------------------|
| $^{55}\text{Co}$ | 17.5            | $\beta^+$ 76 %<br>EC 24 %                | <b>511(152%)</b> , 477(20.2 %), 931(75 %), 1317(7.1%), 1408(16.9%)                                                              |
| $^{64}\text{Cu}$ | 12.7            | $\beta^+$ 18<br>$\beta^-$ 37%<br>EC 24 % | <b>511(36%)</b> , 1346(0.5%)                                                                                                    |
| $^{76}\text{Br}$ | 16.2            | $\beta^+$ 54%<br>EC 46%                  | <b>511(108%)</b> , 559(74%), 657(15.9%), 1216(8.8%), 1854(14.7%), 2391(4.7%), 2792(5.6%), 2950.5(7.4%)                          |
| $^{86}\text{Y}$  | 14.7            | $\beta^+$ 33 %<br>EC 67 %                | <b>511(66%)</b> , 443(16.9%), 628(32.6%), 646(9.2%), 703(15.4%), 778(22.4%), 1077(82.5%), 1153(30.5%), 1854(17.2%), 1920(20.8%) |
| $^{89}\text{Zr}$ | 78.4            | $\beta^+$ 23%<br>EC 77%                  | <b>511(46%)</b> , 909(100%)                                                                                                     |
| $^{124}\text{I}$ | 100.2           | $\beta^+$ 23%<br>EC 77%                  | <b>511(46%)</b> , 603(61%), 723(9.96%), 1691(10.4%)                                                                             |
